# Supplementary material
Source: PubMed Central journal article supplement (PMC7008375)
Supplement: supp_RA119.011605_156674_1_supp_451260_q3bt7m.pdf [file supp_RA119.011605_156674_1_supp_451260_q3bt7m.pdf]

## Supporting Information

**Table S1: Oligonucleotides used in this study**

The following abbreviations are used: 3' rep, 3' replacement; cDNA, complementary DNA; DHFR, dihydrofolate reductase; fwd, forward; LIC, ligation independent cloning; rvs, reverse.

| No. | Primer Name         | Primer Sequence                                  |
|-----|---------------------|--------------------------------------------------|
| 1.  | UroD 3' LIC fwd     | 5'-TACTTCCAATCCAATTTAGCCAGAACGGTGGAGATAAGAGACAGC |
| 2.  | UroD 3' LIC rvs     | 5'-TCCTCCACTTCCAATTTTAGCAACTGTTGAGGTATCTTGGCCCTC |
| 3.  | UroD 3' flank fwd   | 5'-GTCAAGATCTAAAATGCAGGCGTCCTCCTCTCTCC           |
| 4.  | UroD 3' flank rvs   | 5'-GACTGCGGCCGCGTCAGTTGATCTTAATCTACCTCTCC        |
| 5.  | UroD 5' flank fwd   | 5'-GACTTTAATTAACACCAAGAAACCGTTTCGAGAGC           |
| 6.  | UroD 5' flank rvs   | 5'-GACTATGCATGGCGTAGCGACTCTCTCAAAGC              |
| 7.  | UroD screen fwd     | 5'-CTTTGACTTCTCTTCGCGTGAAG                       |
| 8.  | UroD screen rvs     | 5'-GACATCTGCCTATCTGTCTACGC                       |
| 9.  | t7s4 fwd            | 5'- ACGCAGTTCTCGGAAGACG                          |
| 10. | UroD 3' rep fwd     | 5'-GATCAGATCTCGTGACGATGATTGCGTTCCC               |
| 11. | UroD 3' rep rvs     | 5'-GATCCCTAGGAACTGTTGAGGTATCTTGGCCCTCC           |
| 12. | UroD cDNA fwd       | 5'-GTCAAGATCTAAAATGCAGGCGTCCTCCTCTCTCC           |
| 13. | CytC-A 3' rep fwd   | 5'-GATCAGATCTCCAAATGCTCGCAATGCCACACC             |
| 14. | CytC-A 3' rep rvs   | 5'-GATCCCTAGGCTTGTGGAGGCATCAACAAGGTAC            |
| 15. | CytC-B 3' rep fwd   | 5'-GATCAGATCTCCTTCATTTTCAGGTAAGTGAAGTCCG         |
| 16. | CytC-B 3' rep rvs   | 5'-CAGCGGCCGCGCCTGTTTCATGTCGCACACTGG             |
| 17. | CytC1 3' rep fwd    | 5'-TCGAAGATCTGCTGCGGAGTACGACGTGACC               |
| 18. | CytC1 3' rep rvs    | 5'- GATCCCTAGGCAAATACTTCAGCTTTCCGAAATCG          |
| 19. | CCHL1 3' flank fwd  | 5'-GATCCTTAAGCCCGGGATGGCCACCGCGGCAACTTGCCCT      |
| 20. | CCHL1 3' flank rvs  | 5'-CGATGCGGCCGCGTTTTTCCAAGTTCTCTCATTGACC         |
| 21. | CCHL1 5' flank fwd  | 5'-CGATGGGCCCTTGTGCAAATCGCACTGGGCATC             |
| 22. | CCHL1 5' flank rvs  | 5'-CTGACATATGAGAAGAACCAGAAAACGCAGACAG            |
| 23. | CCHL1 screen fwd    | 5'-GGTCAAGCTTTTCGACGG                            |
| 24. | CCHL1 screen rvs    | 5'-GTGCAGTGCATTCTCCAGT                           |
| 25. | CCHL2 3' flank fwd  | 5'-CATGCCTAGGATGGCGGTGAACGATG                    |
| 26. | CCHL2 3' flank rvs  | 5'-GTCAGCGGCCGCGAGTCAGGAAACCTGCTC                |
| 27. | CCHL2 5' flank fwd  | 5'-GATCGGGCCCCGGTTCTACACAAGAAGTGGCTTTCTG         |
| 28. | CCHL2 5' flank rvs  | 5'-GACTCATATGGTGAAAACGGGAATTTGACAGGTCTG          |
| 29. | CCHL2 3' screen fwd | 5'- CTACACTGTAGAGAGGGTTCTGCC                     |
| 30. | CCHL2 3' screen rvs | 5'- CGCTCGCGTTACCTGAGAGTC                        |
| 31. | CCHL2 5' screen fwd | 5'- CGTTACGAAGCACCGACAGGAG                       |
| 32. | CCHL2 5' screen rvs | 5'- TGACGCTGGCAGAACCCTC                          |
| 33. | DHFR cassette rvs   | 5'- GGTGTCGTGGATTTACCAGTCAT                      |

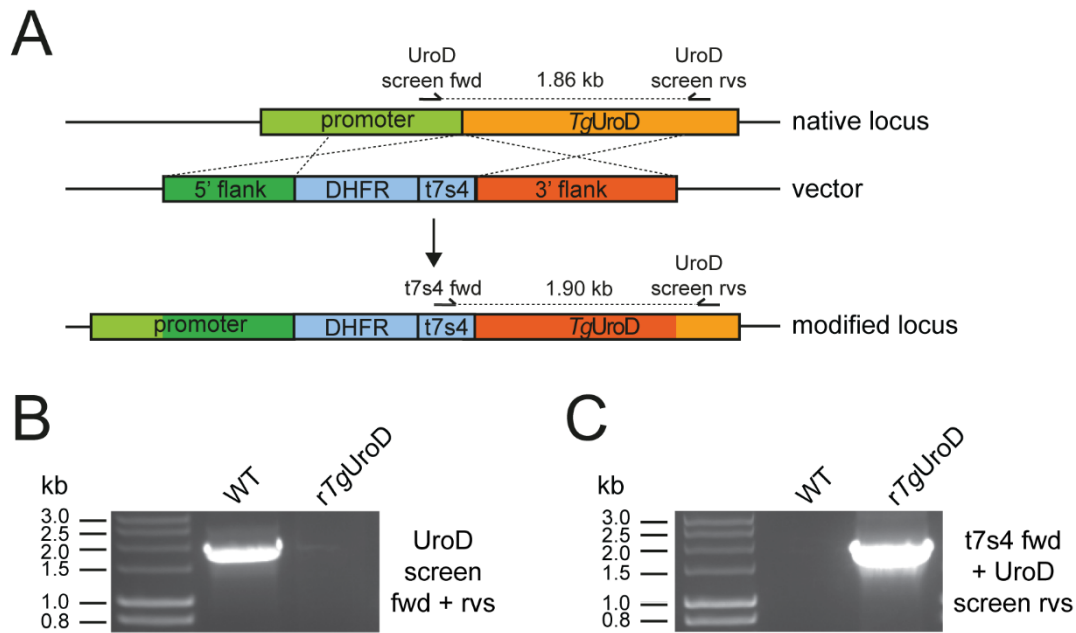

**Figure S1. Generation of *rTgUroD* parasites.** (A) Schematic of the genetic strategy employed for generating the *rTgUroD* cell line. The native promoter of *TgUroD* (light green) was replaced by an ATc-regulatable tet operator  $\times$  7/sag4 (*t7s4*) promoter and pyrimethamine-resistant dihydrofolate reductase (DHFR) marker by homologous recombination using 5' and 3' flanking regions around the *TgUroD* start codon (dark green and dark orange respectively). The relative positions of primers used in subsequent PCR screens are indicated. (B-C) Polymerase chain reaction (PCR) screens to test for the presence of (B) the native locus or (C) the genetically modified locus using the indicated primers and genomic DNA extracted from wild type (WT) or clonal *rTgUroD* parasites. These screens indicated successful modification of the *TgUroD* locus with the ATc-regulatable promoter.

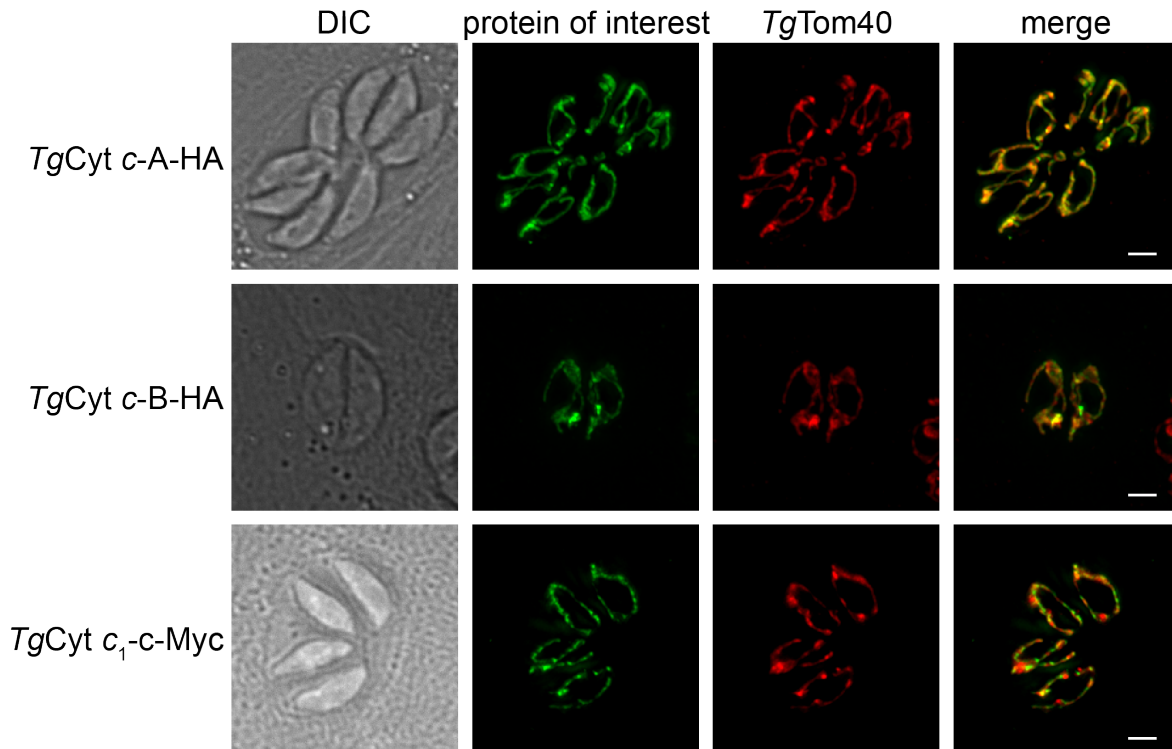

**Figure S2. Localisation of epitope-tagged *c*-type cytochrome proteins in *T. gondii*.**

Immunofluorescence assays examining the localisation of epitope-tagged *c*-type cytochromes (green) in *T. gondii*. Parasites were co-labelled with antibodies against the mitochondrial marker *TgTom40* (red). Included are HA tagged *TgCyt c-A* (top), HA-tagged *TgCyt c-B* (middle), and *c-Myc*-tagged *TgCyt c<sub>1</sub>* (bottom). DIC, differential interference contrast image. Scale bars are 2  $\mu\text{m}$ .

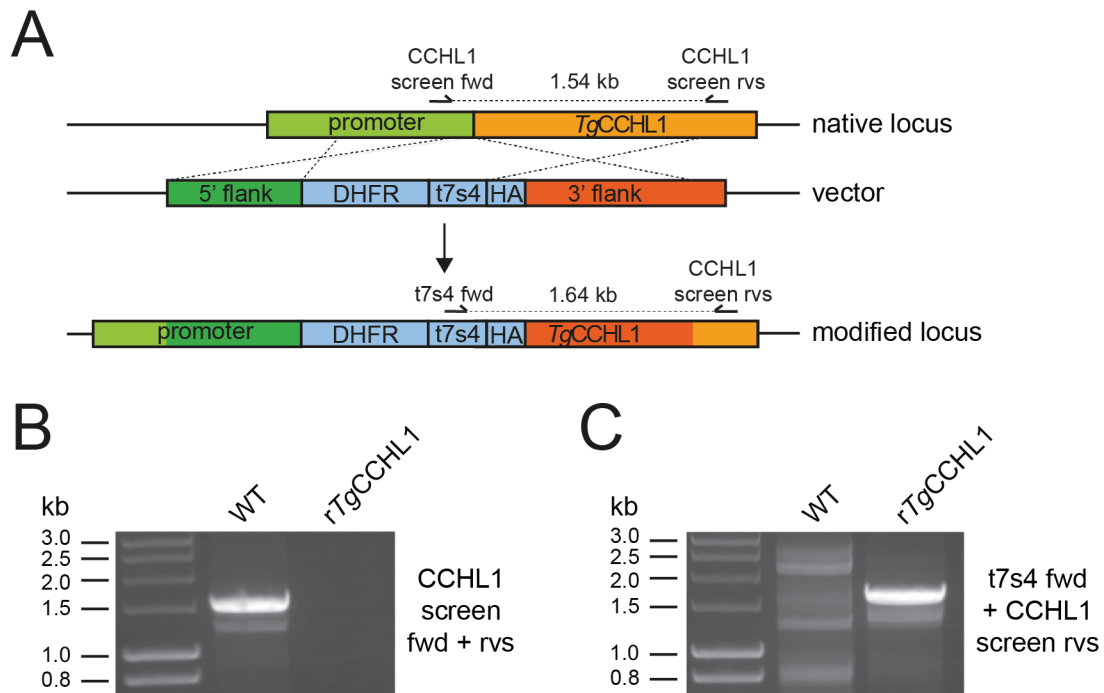

**Figure S3. Generation of *rTgCCHL1* parasites.** (A) Schematic of the genetic strategy employed for generating the *rTgCCHL1* cell line. The native promoter of *TgCCHL1* (light green) was replaced by an ATc-regulatable *t7s4* promoter, a  $3 \times$  HA tag, and a pyrimethamine-resistant dihydrofolate reductase (DHFR) marker by homologous recombination using 5' and 3' flanking regions around the *TgCCHL1* start codon (dark green and dark orange respectively). The relative positions of primers used in subsequent PCR screens are indicated. (B-C) Polymerase chain reaction (PCR) screens to test for the presence of (B) the native locus or (C) the genetically modified locus using the indicated primers and genomic DNA extracted from wild type (WT) or clonal *rTgCCHL1* parasites. These screens indicate successful modification of the *TgCCHL1* locus with the HA-tag and ATc-regulatable promoter.

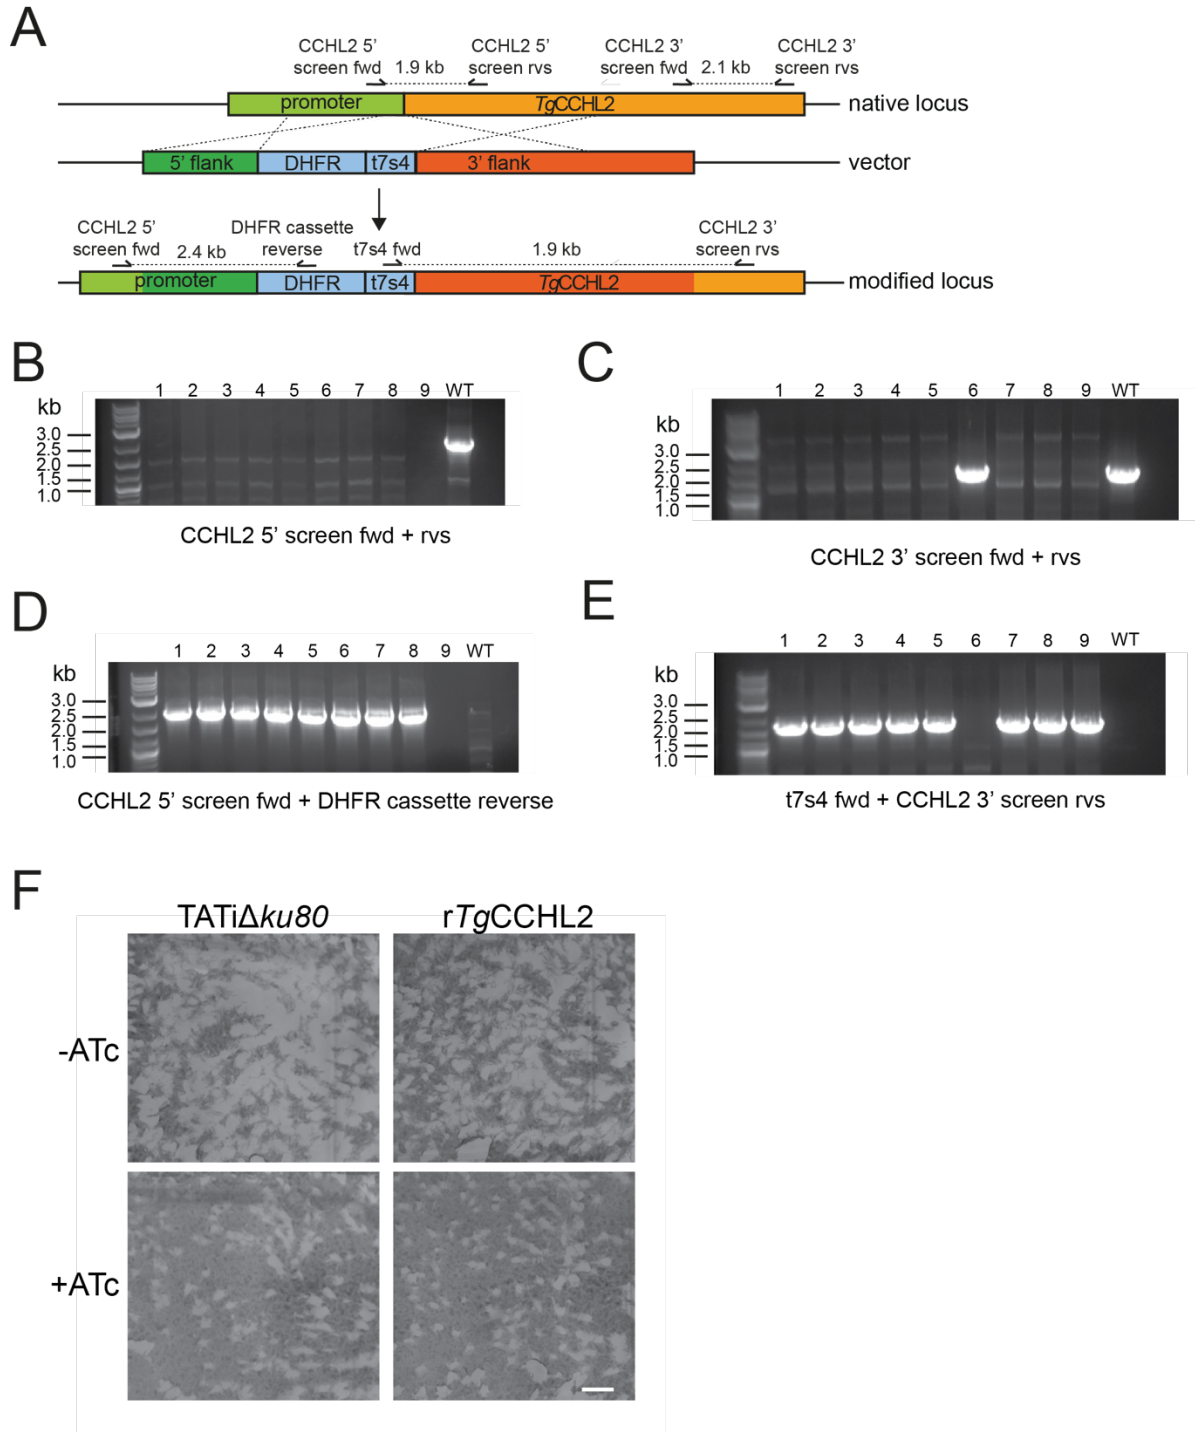

**Figure S4. Generation and characterization of rTgCCHL2 parasites.** (A) Schematic of the genetic strategy employed for generating the rTgCCHL2 cell line. The native promoter of *TgCCHL2* (light green) was replaced by an ATc-regulatable *t7s4* promoter and a pyrimethamine-resistant dihydrofolate reductase (DHFR) marker by homologous recombination using 5' and 3' flanking regions around the *TgCCHL2* start codon (dark green and dark orange respectively). The relative positions of primers used in subsequent PCR screens are indicated. (B-E) Polymerase chain reaction (PCR) screens to test for the presence of (B) the 5' region of the native locus, (C) the 3' region of the native locus, (D) the 5' region of

the genetically modified locus, or (E) the 3' region of the genetically modified locus, using the indicated primers. Genomic DNA was extracted from 9 different clonal *rTgCCHL2* parasite lines or from WT parasites. The screens indicate successful modification of the *TgCCHL2* locus in clones 1-5, 7 and 8. **(F)** Plaque assay of WT (*TATiΔku80*; left) and *rTgCCHL2* (right) parasites cultured in the absence (top) or presence (bottom) of ATc for 8 days. Data are from a single experiment and are representative of 2 independent experiments. Scale bar is 10 mm.

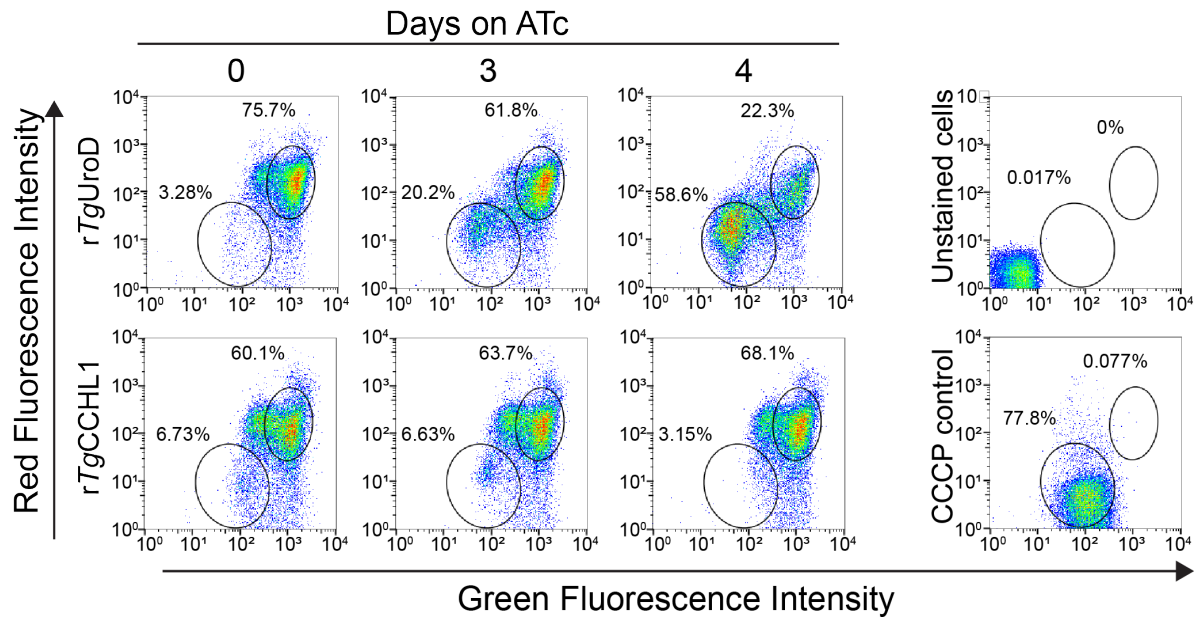

**Figure S5. Knockdown of *TgUroD* but not *TgCCHL1* leads to dissipation of mitochondrial membrane potential ( $\Delta\Psi_m$ ).** *rTgUroD* parasites (top) and *rTgCCHL1* parasites (bottom) were grown in the absence of ATc or the presence of ATc 3-4 days, then stained with sensitive dye JC-1. Green fluorescence (x axis) and red fluorescence (y axis) were measured by flow cytometry. Dual red/green fluorescence is indicative of a high  $\Delta\Psi_m$ , whereas a depletion in red fluorescence is indicative of a dissipated  $\Delta\Psi_m$ . Controls included unstained parasites (top, right) and parasites treated with the protonophore CCCP to dissipate  $\Delta\Psi_m$ . Data shown is from a single experiment.

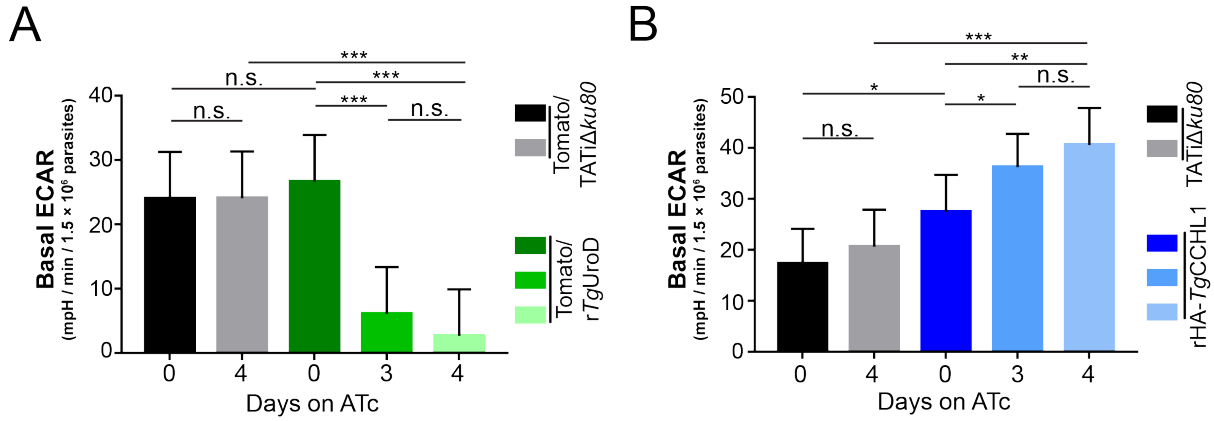

**Figure S6. Knockdown of *TgUroD* leads to a decrease in extracellular acidification rate (ECAR), whereas knockdown of *TgCCHL1* leads to an increase in ECAR.** Basal ECAR in (A) parental Tomato/TATiΔku80 (black/gray) and rTgUroD (green) parasites, or (B) TATiΔku80 parental (black/gray) and rHA-TgCCHL1 parasites (blue). Parasites were grown in the absence of ATc, or in the presence of ATc for 3 or 4 days. Data depict the least square means from a linear mixed model ± 95% confidence limits from 3 independent experiments (\*,  $P < 0.05$ ; \*\*,  $P < 0.01$ ; \*\*\*,  $P < 0.001$ ; n.s. = not significant,  $P > 0.05$ ; ANOVA with Tukey's post hoc test).
